## 15 **Abstract**

16       Hybrid crop breeding programs using a two-part strategy produced the most genetic gain,  
17 but a maximum avoidance of inbreeding crossing scheme was required to increase long-term  
18 genetic gain. The two-part strategy uses outbred parents to complete multiple generations per  
19 year to reduce the generation interval of hybrid crop breeding programs. The maximum  
20 avoidance of inbreeding crossing scheme manages genetic variance by maintaining uniform  
21 contributions and inbreeding coefficients across all crosses. This study performed stochastic  
22 simulations to quantify the potential of a two-part strategy in combination with two crossing  
23 schemes to increase the rate of genetic gain in hybrid crop breeding programs. The two crossing  
24 schemes were: (i) a circular crossing scheme, and (ii) a maximum avoidance of inbreeding  
25 crossing scheme. The results from this study show that the implementation of genomic  
26 selection increased the rate of genetic gain, and that the two-part hybrid crop breeding program  
27 generated the highest genetic gain. This study also shows that the maximum avoidance of  
28 inbreeding crossing scheme increased long-term genetic gain in two-part hybrid crop breeding  
29 programs completing multiple selection cycles per year, as a result of maintaining higher levels  
30 of genetic variance over time. The flexibility of the two-part strategy offers further  
31 opportunities to integrate new technologies to further increase genetic gain in hybrid crop  
32 breeding programs, such as the use of outbred training populations. However, the practical  
33 implementation of the two-part strategy will require the development of bespoke transition  
34 strategies to fundamentally change the data, logistics, and infrastructure that underpin hybrid  
35 crop breeding programs.

36

37

## 38 **Introduction**

39           The two-part strategy produced the most genetic gain in hybrid crop breeding programs,  
40 but the maximum avoidance of inbreeding crossing scheme was required for it to increase long-  
41 term genetic gain. The two-part strategy uses outbred parents to complete multiple generations  
42 per year in hybrid crop breeding programs. In contrast, conventional plus genomic selection  
43 strategies are limited in this regard by the time they take to develop inbred lines. The maximum  
44 avoidance of inbreeding crossing scheme manages genetic variance by maintaining uniform  
45 contributions and inbreeding coefficients across all crosses. This study performed stochastic  
46 simulations to quantify the potential of a two-part strategy to increase the rate of genetic gain  
47 in hybrid crop breeding programs. A large increase in food production is required to meet the  
48 demand for a global population of 9 billion people in 2050. Increasing the rate of genetic gain  
49 of breeding programs is one route to achieve sustainable, permanent and cumulative increases  
50 in food production. Hybrid crops, and their genetic improvement, have made major  
51 contributions to historical increases in food production. For example, genetic merit for maize  
52 yield has approximately doubled from 1930 to 2001 (Duvick et al. 2010; Fig. 4.1). However,  
53 the current rates of genetic gain in hybrid crop breeding programs are insufficient to meet the  
54 estimated 70% increase in overall food production (Alexandratos and Bruinsma 2012) required  
55 within the next 30 years.

56           Genomic selection could increase the rate of genetic gain in hybrid crop breeding  
57 programs by directly addressing three of the parameters of the breeder's equation. The  
58 breeder's equation provides a framework to understand how the rates of genetic gain in  
59 breeding programs can be increased (Lush 1943). The breeder's equation shows that genetic  
60 gain is a function of (i) the accuracy of ranking selection candidates based on genetic merit,  
61 (ii) the intensity of selection, (iii) the genetic variance in the population, and (iv) the generation  
62 interval. Genomic selection could increase the rate of genetic gain in hybrid crop breeding

63 programs by reducing the generation interval, increasing the selection intensity and increasing  
64 the selection accuracy.

65 Hybrid crop breeding program designs involve multiple stages with selection  
66 candidates evaluated against an increasing number of testers in an increasing number of  
67 environments. As the accuracy of evaluation increases through the stages of evaluation,  
68 individuals are recycled by reciprocal recurrent testcross selection (Bernardo, 2014; Hull,  
69 1945) and crossed to create the next set of selection candidates. Reciprocal recurrent testcross  
70 selection aims to improve the general combining ability of selection candidates. However, the  
71 development of inbred individuals in reciprocal recurrent testcross selection requires time  
72 which results in longer breeding cycle times and slows the rate of population improvement.  
73 For example, hybrid crop breeding program designs typically have a cycle time of 3 to 4 years  
74 and are not radically different from a typical breeding program design for inbred crops.

75 Genomic selection can increase the rate of population improvement in plant breeding  
76 programs. Recently, Gaynor et al. (2017) proposed a two-part breeding strategy for inbred  
77 crops that explicitly separates a conventional plant breeding program into two distinct  
78 components. These components are:

- 79 (i) a population improvement component to develop improved germplasm via  
80 recurrent genomic selection, and;  
81 (ii) a product development component to identify new inbred varieties within  
82 conventional plant breeding program designs.

83 Gaynor et al. (2017) used simulation to compare conventional and two-part breeding program  
84 designs in the context of inbred crops. Compared to the conventional design, the two-part  
85 strategy generated 2.4 times more genetic gain per unit cost and unit time.

86 Conceptually the two-part strategy is equally suited to hybrid crop breeding programs.  
87 In a hybrid crop breeding program, the two-part strategy could enable large increases in genetic

88 gain by shortening the generation interval considerably. However, in the context of hybrid  
89 crops, population improvement would need to be driven by reciprocal recurrent genomic  
90 selection rather than recurrent genomic selection. Reciprocal recurrent selection aims to  
91 improve the general combining ability of individuals in different heterotic pools. Reciprocal  
92 recurrent genomic selection (Kinghorn et al. 2010) uses the phenotypes and parental genotypes  
93 of hybrids to more accurately estimate the general combining ability of individuals (Rembe et  
94 al. 2019).

95         However, the previous implementations of the two-part strategy in inbred crops showed  
96 that large reductions of the generation interval came at the expense of genetic variation. Gaynor  
97 et al. (2017) showed that two-part breeding programs that used rapid cycling to reduce the  
98 generation interval below 0.5 years reduced long-term genetic gain. Using simulation, Gorjanc  
99 et al. (2018) showed that long-term genetic gain can be optimised with crossing schemes that  
100 balance increases in genetic gain with reductions in genetic variance. Maximum avoidance of  
101 inbreeding is a crossing scheme that maintains uniform contributions across generations and  
102 uniform inbreeding coefficients across all crosses (Wright 1921; Kimura and Crow 1963). Due  
103 to the large number of generations per year that can be completed with the two-part strategy,  
104 the use of maximum avoidance of inbreeding could increase long-term genetic gain in hybrid  
105 crop breeding programs.

106         The objective of this study was to develop and test the two-part strategy in the context  
107 of hybrid crops. Stochastic simulations were used, with a maize breeding program as a model,  
108 to compare conventional, conventional plus genomic selection and two-part hybrid crop  
109 breeding programs under an assumption of approximately equal operating costs and time. To  
110 manage long-term genetic variance, both a circular crossing scheme and a maximum avoidance  
111 of inbreeding crossing scheme were used in conjunction with genomic selection. The results  
112 show that: (i) the implementation of genomic selection in hybrid crop breeding programs

113 increases the rate of genetic gain, (ii) the two-part strategy was the most cost-effective strategy  
114 for implementing genomic selection in hybrid crop breeding programs, and (iii) two-part  
115 hybrid crop breeding programs completing multiple selection cycles per year should use  
116 methods to manage genetic variance.  
117

## 118 **Methods**

119 Stochastic simulations of entire hybrid crop breeding programs were used to compare:

- 120 • a conventional breeding program not using genomic selection;
- 121 • three conventional plus genomic selection breeding programs, and;
- 122 • two breeding programs implementing the two-part strategy.

123 These breeding programs were compared on an equal time across 40 years of breeding. Each  
124 breeding program was constrained to have approximately equal operating costs so that direct  
125 comparisons between the different breeding programs would represent their relative  
126 effectiveness. The six different breeding programs were compared using 10 independent  
127 replicates of a stochastic simulation for three levels of genotype-by-year interaction variance.  
128 Each replicate consisted of:

- 129 (i) a burn-in phase shared by all strategies so that each strategy had an identical,  
130 realistic starting point, and;
- 131 (ii) a future breeding phase that simulated 20 years of future breeding with each of  
132 the different breeding strategies.

133

### 134 **Burn-In Phase**

135

136 Specifically, the burn-in phase was subdivided into three stages. The first stage  
137 simulated the species' genome sequence. The second stage simulated trait architecture and  
138 founder genotypes for the initial parents. The third stage simulated 20 years of breeding using  
139 the conventional breeding strategy without genomic selection.

140

141 *Generation of whole genome sequence data*

142

143 For each replicate, a genome consisting of 10 chromosome pairs was simulated to  
144 resemble the maize genome. These chromosomes were assigned a genetic length of 2.0  
145 Morgans and a physical length of  $2 \times 10^8$  base pairs. Sequences for each chromosome were  
146 generated using the Markovian Coalescent Simulator (Chen et al. 2009) within AlphaSimR  
147 (Gaynor et al. 2019). Recombination and mutation rates were respectively set to  $1.25 \times 10^{-8}$  per  
148 base pair and  $1 \times 10^{-8}$  per base pair. Historical effective population size was simulated,  
149 beginning with a single population, as follows; 100,000 at 6,000 generations ago, 10,000 at  
150 2,000 generations ago, 5,000 at 1,000 generations ago, 1,000 at 100 generations ago. To mimic  
151 the genetic separation of two heterotic groups the population was split 200 generations ago.  
152 The final effective population size at the end of the coalescent simulation was set to 100 for  
153 each heterotic group. These values were chosen to roughly follow the evolution of effective  
154 population size in North American hybrid maize.

155

156 *Founder Genotypes*

157

158 The founders served as the initial parents in the burn-in breeding phase. This was  
159 accomplished by randomly sampling gametes from the simulated genome to assign as  
160 sequences for the founders. 80 founders were created for each of the two heterotic groups. Sites  
161 segregating in the founders' sequences were randomly selected to serve as 2000 single  
162 nucleotide polymorphism (SNP) markers per chromosome (20000 total) and 300 quantitative  
163 trait nucleotides (QTL) per chromosome (3000 total). The randomly selected sites for SNP



164 markers and QTL were not allowed to overlap. The founders were converted to inbred lines by  
165 simulating the formation of doubled haploids (DH).

166

### 167 *Trait Architecture*

168

169 Three types of biological effects were modelled at each QTL to simulate genetic values:  
170 additive effects, dominance effects and genotype-by-year effects. Under the AlphaSimR  
171 framework, this is referred to as an ADG trait. We will give only a brief summary of the  
172 modelling procedure, while a detailed description can be found in the vignette of the  
173 AlphaSimR package (Gaynor et al. 2019).

174 A single trait representing grain yield, controlled by 3,000 QTL, was simulated for all  
175 individuals. Each QTL was assigned an additive genetic effect, composed of additive and  
176 genotype-by-year effects, and a dominance effect resulting from the interaction between alleles  
177 at a heterozygous locus. Epistatic gene action was not considered. Three levels of genotype-  
178 by-year variance were examined: 0, 2 and 4 times the genetic variance. Dominance effects  
179 were calculated by multiplying the absolute value of each QTL allele effect by a locus-specific  
180 dominance deviation ( $\delta$ ). Dominance deviations were sampled from a normal distribution with  
181 mean dominance deviation of 0.92 and variance of 0.2, to approximate historical levels of  
182 heterosis displayed in commercial maize (Troyer and Wellin 2009). The genetic value of each  
183 QTL was then defined as the sum of additive QTL effects and the dominance effect of  
184 interacting alleles. Finally, the genetic value of each individual was obtained as the sum of all  
185 of the QTL genetic values, accounting for the individuals' genotype at these QTL.

186 The genetic value of each individual was used to produce phenotypic values by adding  
187 random error. The random error was sampled from a normal distribution with mean zero. The  
188 variance of the random error varied according to the stage of evaluation in the breeding

189 program. This was done to account for increasing accuracy in the evaluation as the number of  
190 replications per entry increased. The values for these error variances were set to achieve target  
191 levels of heritability. The levels of heritability represented heritability on an entry-mean basis  
192 for the 80 founder genotypes when genotype-by-year variance was absent. The levels of  
193 heritability that were used are presented in the description of the conventional breeding  
194 program below.

195

### 196 *Conventional Breeding Program*

197

198 Burn-in breeding for yield was simulated using 20 years of breeding in a conventional  
199 program without genomic selection. The design of the burn-in program approximated existing  
200 maize breeding programs taken from Bernardo (2014; Table 8.3). The key features of the two  
201 heterotic groups in this breeding program were:

- 202 (i) a crossing block consisting of 80 DH lines used to develop 80 biparental  
203 populations each year;
- 204 (ii) the development of 25 new DH lines from each biparental cross;
- 205 (iii) a 3-year cycle time from crossing to selection of new parents; and
- 206 (iv) a 6-year production interval from crossing to release of a new commercial  
207 hybrid.

208 All selection in the burn-in program was performed using phenotypes. These  
209 phenotypes represented direct selection on yield using a yield trial. The levels of heritability at  
210 a particular selection stage were adapted from the number of DH lines and locations reported  
211 in Bernardo (2014; Table 8.3). A schematic for the overall design of the burn-in program is  
212 given in Fig. 1 and a detailed description follows below. Each of the stages, described below,

213 were conducted independently in the two heterotic groups. The progression of germplasm  
214 through the breeding program was simulated using AlphaSimR (Gaynor et al. 2019).

215

216 *Year 1*

217

218 80 bi-parental populations were created with intra-heterotic group crosses. It was  
219 ensured that each of the 80 parental DH lines was used as a male or female only once. Each  
220 cross produced 25 F<sub>1</sub> derived doubled haploid lines (Geiger and Gordillo 2009). The 2,000 DH  
221 lines were planted in separate plots. No selection was performed at this stage. Each DH line  
222 was crossed to a single inbred tester.

223

224 *Year 2*

225

226 The 2,000 DH testcrosses (1 tester x 2,000 DH lines) were evaluated in the testcross 1  
227 (TC1) stage. The TC1 stage represented yield measured in unreplicated, two-row plots across  
228 6 locations. Selection in the TC1 stage was modelled as the selection on a yield phenotype with  
229 a heritability of 0.54. The best performing 400 DH lines were advanced to the next trial based  
230 on general combining ability. Each of the 400 DH lines was crossed to 3 inbred testers.

231

232 *Year 3*

233

234 The 1,200 DH testcrosses (3 testers x 400 DH lines) were evaluated in the testcross 2  
235 (TC2) stage. The TC2 stage represented yield measured in unreplicated, two-row plots across  
236 12 locations. Selection in the TC2 stage was modelled as the selection on a yield phenotype  
237 with a heritability of 0.71. The best performing 40 DH lines were advanced to the next trial

238 based on general combining ability. These 40 DH lines were then crossed to 5 ‘elite’ DH lines  
239 from the other heterotic group. This produced 200 single cross experimental hybrids.

240

241 *Year 4*

242

243 The 200 experimental hybrids were evaluated in the elite yield trial (EYT) stage. The  
244 EYT stage represented yield measured in unreplicated, two-row plots across 24 locations.  
245 Selection in the EYT stage was modelled as the selection on a yield phenotype with a  
246 heritability of 0.82. The best performing 20 experimental hybrids were advanced to the next  
247 trial.

248

249 *Year 5*

250

251 The 20 experimental hybrids were evaluated in the hybrid yield trial 1 (HYT1) stage.  
252 The HYT1 stage represented yield measured in unreplicated, two-row plots across 48 locations.  
253 Selection in the HYT1 stage was modelled as the selection on a yield phenotype with a  
254 heritability of 0.98. The best performing 4 experimental hybrids were advanced to the next  
255 trial.

256

257 *Year 6*

258

259 The 4 pre-commercial hybrids were evaluated in the hybrid yield trial 2 (HYT2) stage.  
260 The HYT2 stage represented yield measured in on-farm strip tests of pre-commercial hybrids  
261 across 600 locations. Selection in the HYT2 stage was modelled as the selection on a yield

262 phenotype with a heritability of 0.99. Commercial hybrids were selected for release from this  
263 set of pre-commercial hybrids.

264

## 265 **Future Breeding**

266

267 The future breeding phase of the simulation modelled alternative breeding programs  
268 and compared them against the conventional breeding program. Each breeding program was  
269 simulated for an additional 20 years following a common burn-in breeding phase so that each  
270 strategy could be evaluated with an equivalent starting point. Two crossing schemes were used  
271 in breeding programs with a generation interval of 1 year or less. All breeding programs were  
272 constrained to equivalent operating costs (Table 1).

273 **Table 1 Summary of hybrid crop breeding program sizes (number of individuals across both heterotic**  
274 **pools) and costs. DH, doubled haploid; EYT, elite yield trial; HYT I, hybrid yield trial 1; HYT II, hybrid**  
275 **yield trial 2**

| <b><u>Breeding Program</u></b>                       | <b><u>Parents</u></b> | <b><u>DH</u></b> | <b><u>TC1</u></b> | <b><u>TC2</u></b> | <b><u>EYT</u></b> | <b><u>HYT1</u></b> | <b><u>HYT2</u></b> | <b><u>Cost (\$)</u></b> |
|------------------------------------------------------|-----------------------|------------------|-------------------|-------------------|-------------------|--------------------|--------------------|-------------------------|
| Conventional                                         | 80                    | 4000             | 4000              | 2400              | 400               | 40                 | 8                  | 1,276,800               |
| Conventional Plus<br>Genomic Selection<br>Strategies | 80                    | 3840             | 3840              | 2196              | 400               | 40                 | 8                  | 1,273,680               |
| Two-Part Strategies                                  | 80                    | 3200             | 3200              | 1728              | 400               | 40                 | 8                  | 1,271,040               |

276

## 277 **Cost Equalizing Strategy**

278 To ensure approximately equal operating costs across different breeding programs, the  
279 number of DH lines tested across the product development component was reduced in breeding  
280 programs using genomic selection. Table 1 details the exact numbers in each of the breeding  
281 programs using genomic selection. Since the two-part breeding programs used multiple cycles  
282 per year, they resulted in up to three times as many crosses per year. Therefore, the number of

283 candidate DH lines was reduced further compared to the conventional plus genomic selection  
284 breeding programs. To equalize genotyping costs within the population improvement  
285 component of the two-part strategy, the number of genotyped offspring per cross was reduced  
286 with each additional crossing cycle per year: (i) 1 cycle/year – 80 seeds genotyped per cross;  
287 and (ii) 3 cycles/year – 26 seeds genotyped per cross. The remaining components of the  
288 breeding programs were kept constant.

289 Estimated costs for genotyping, phenotyping and producing DH lines were used in the  
290 equalisation of operating costs. The cost for producing doubled haploid lines was estimated at  
291 \$45 based on the lowest publicly advertised price  
292 (<http://www.plantbreeding.iastate.edu/DHF/DHF.htm>). Genotype costs and phenotypic  
293 evaluation of a yield trial plot, were assumed to be equivalent at a cost of \$15  
294 (<http://techservicespro.com/test-locations/>). The cost for crossing, which in any case would be  
295 small, was not considered even though it varied between breeding programs.

296

## 297 **Genomic Selection Training Population & Method**

298

299 Genomic selection in each hybrid crop breeding program used initial training  
300 populations comprising the last 3 years of testcross I and II yield trial data from the recent  
301 breeding burn-in phase. Separate training populations were developed for each of the two  
302 heterotic pools. Thus, the initial training populations comprised phenotypic records on 7,200  
303 testcross genotypes. The training populations were updated in subsequent years via a 3-year  
304 sliding window approach, in which the oldest year of data was replaced with the data from the  
305 newest year. As a consequence of the cost equalisation process the training population sizes  
306 were reduced to phenotypic records on 6,858 and 5,664 testcross genotypes for conventional  
307 genomic selection and two-part breeding strategies, respectively.

308           The genotypes and testcross phenotypic means of the DH selection candidates were  
309 fitted using the genomic selection model used by Bernardo and Yu (2007), and the genetic  
310 background of the tester was accounted for by fitting a tester-by-stage fixed effect. A separate  
311 genomic selection model was fitted for each heterotic pool. Genomic predictions were  
312 calculated using the AlphaSimR function “RRBLUP”. This function fits a ridge regression best  
313 linear unbiased prediction model (Whittaker et al. 2000). It models the heterogeneous error  
314 variance due to different levels of error in each yield trial by weighting for the effective number  
315 of field measurements.

316

### 317 **Conventional plus Genomic Selection Breeding Programs**

318

319           Three conventional plus genomic selection breeding programs were used to quantify  
320 the increase in genetic gain due to the implementation of genomic selection within the  
321 traditional structure of a conventional breeding program. The design of these programs used  
322 the conventional program as a template. Minimal modifications were made to this template to  
323 produce the designs for each strategy.

324

#### 325 *Conventional Genomic Selection Breeding Program*

326

327           The conventional plus genomic selection (ConvGS) breeding program used genomic  
328 selection to advance candidate DH lines in the testcross 1 and testcross 2 stages and to select  
329 parental lines for the subsequent breeding cycle. The parental lines were selected by choosing  
330 the 80 DH lines with the highest genomic estimated breeding values (GEBVs) from a set of  
331 candidates that comprised all DH lines from the testcross 2 stage and later yield trials. The

332 minimum cycle time from bi-parental cross to the selection of new parental lines was 3 years,  
333 the same as in the conventional breeding program.

334

#### 335 *Genomic Selection Testcross 1 Breeding Program*

336

337 The genomic selection testcross 1 (GS-TC1) breeding program used genomic selection  
338 to advance candidate DH lines in the testcross 1 and testcross 2 stages and to select parental  
339 lines for the subsequent breeding cycle. The parental lines were selected by choosing the 80  
340 DH lines with the highest GEBVs from a set of candidates that comprised all DH lines from  
341 the testcross 1 stage and later yield trials. This reduced the minimum cycle time from bi-  
342 parental cross to the selection of new parental lines from 3 years in the conventional program  
343 to 2 years.

344

#### 345 *Genomic Selection Doubled Haploids Breeding Program*

346

347 The genomic selection doubled haploids (GS-DH) breeding program used genomic  
348 selection to advance candidate DH lines in the testcross 1 and testcross 2 stages and to select  
349 parental lines for the subsequent breeding cycle. The parental lines were selected by choosing  
350 the 80 DH lines with the highest GEBVs from a set of candidates that comprised all DH lines  
351 from the DH stage. This reduced the minimum cycle time from bi-parental cross to the selection  
352 of new parental lines from 3 years in the conventional program to 1 year.

353

#### 354 **Two-Part Breeding Programs**

355



356 Crossing and selection of new parents in the two-part breeding programs was handled  
357 in the population improvement component (Fig. 3), which consisted of one or three crossing  
358 cycles per year (TP GS (1 cycle/year) and TP GS (3 cycles/year)). Parents were then grown in  
359 greenhouses and at the appropriate stage, crossings were undertaken following a circular  
360 scheme or a maximum avoidance of inbreeding scheme as described in the next section.

361 The product development component of the two-part program screened the germplasm  
362 to identify new commercial hybrids (Fig. 3). This process began with the production of the new  
363 DH lines. The DH lines were screened for testcross and single cross hybrid performance in the  
364 same manner as in the conventional plus genomic selection strategies. In two-part breeding  
365 programs none of the DH lines were selected for the crossing block, but their genomic and  
366 testcross phenotypic data were added to the genomic selection training population. This  
367 allowed the genomic selection model used in the population improvement component to be  
368 updated over time as new material was evaluated in the field.

369

## 370 **Crossing of Parents**

371

372 Two crossing schemes were used in hybrid crop breeding programs:

- 373 (i) a circular crossing scheme; and
- 374 (ii) a maximum avoidance of inbreeding crossing scheme.

375 The circular crossing scheme used both between-family and within-family selection to select  
376 the 80 selection candidates with the highest genomic estimated breeding values (GEBVs). In  
377 each generation 80 crosses were made, ensuring that each parent was used only once as a male  
378 and a female. Consequently, this circular crossing scheme is different from the ‘circular design’  
379 described by Kimura & Crow (1963), which only conducts within-family selection.

380 Hybrid crop breeding programs using genomic selection, with a generation interval of  
381 1 year or less, also used the maximum avoidance of inbreeding crossing scheme. Maximum  
382 avoidance of inbreeding is a crossing scheme that maintains uniform contributions and  
383 inbreeding coefficients across all crosses (Wright 1921; Kimura and Crow 1963). The  
384 maximum avoidance of inbreeding crossing scheme mates the least related crosses in the first  
385 generation and maintains this crossing structure over generations. In the present study, the  
386 maximum avoidance of inbreeding scheme used within-family genomic selection to select the  
387 2 selection candidates with the highest GEBVs per cross as new parents, giving 160 parents in  
388 total. In each generation 80 crosses were made, ensuring that each parent was used only once  
389 as a male or a female.

390

### 391 **Comparison of Breeding Programs**

392

393 The performance of each breeding program was measured by comparing genetic gain  
394 and genetic variance of hybrids from the EYT stage. These hybrids were the crosses between  
395 all DH lines at the EYT stage from the two heterotic pools. The EYT stage was examined  
396 because it is the earliest stage in which all breeding programs evaluate DH lines for single cross  
397 hybrid performance. Genetic gain and genetic variance in the breeding programs were assessed  
398 by plotting mean and variance of true genetic values for hybrids at the EYT stage over time.

399 Accuracy of genomic prediction, defined in the next section, was assessed at the DH  
400 stage. The DH stage was examined because it allowed an assessment of the ability to rank all  
401 possible DH lines as parents of hybrids in the two heterotic pools. Accuracy of genomic  
402 predictions was also assessed in the population improvement components to estimate the  
403 accuracy of parent selection in the two-part breeding programs.

404 To aid in visualization, the mean values were centred at the mean value for lines in Year  
405 0 for each replicate. Year 0 was defined as the last year of the burn-in phase. Direct comparisons  
406 between breeding programs for genetic gain, genetic variance and accuracy of genomic  
407 predictions were reported as ratios with 95% confidence intervals (95% CI). These ratios and  
408 95% CI were calculated by performing paired Welch's t-tests on log-transformed values from  
409 the 10 simulation replicates. The log-transformed differences and 95% CI from the t-test were  
410 then back-transformed to obtain ratios (Ramsey and Schafer 2002). All calculations were  
411 performed using R (R Development Core Team 2014).

412

#### 413 *Measurement of genomic selection accuracy*

414

415 Accuracy of genomic prediction was defined as the correlation between the general  
416 combining ability (GCA) of DH lines and their GEBV. The GCA of an individual was  
417 calculated as the sum of all the average effects at the QTL weighted by the individuals genotype  
418 at these QTL. The average effects of alleles were calculated using allele frequencies from the  
419 corresponding population of DH lines in the other heterotic pool and the true simulated additive  
420 and dominance effects for each QTL. Therefore, the GCA of a DH line reflected its average  
421 performance as a parent in single cross hybrids when crossed to all DH lines from the other  
422 heterotic group.

423

## 424 **Results**

425           Genomic selection increased the rate of genetic gain compared to phenotypic selection  
426 in hybrid crop breeding programs, mainly by reducing the generation interval. The two-part  
427 hybrid crop breeding program, with a generation interval of 0.33 years, produced the most  
428 genetic gain regardless of genotype-by-year variance. Genomic selection **increased** the  
429 selection accuracy compared to phenotypic selection in the early stages of hybrid crop breeding  
430 programs. There was a perfect rank correlation between the reduction in the generation interval  
431 and the reduction of genetic variance in hybrid crop breeding programs. Genomic selection  
432 reduced the efficiency of conversion of genetic variance into genetic gain compared to  
433 phenotypic selection. However, the use of the maximum avoidance of inbreeding crossing  
434 scheme **slowed** the reduction of genetic variance and increased the efficiency of conversion of  
435 genetic variance to genetic gain compared to the circular crossing scheme.

436

## 437 **Genetic Gain**

438

439           Genomic selection increased the rate of genetic gain compared to phenotypic selection  
440 in hybrid crop breeding programs, mainly by reducing the generation interval. This is shown  
441 in Fig. 4, which presents the mean genetic value of hybrids at the elite yield trial stage. The  
442 first graph shows the trends for the mean for each of the breeding programs evaluated in the  
443 future breeding component when genotype-by-year variance is 0. The second graph shows the  
444 same trends for genotype-by-year variance of 4. Both graphs show that the two-part breeding  
445 program, with the shortest generation interval of 0.33 years, produced the most genetic gain.  
446 When genotype-by-year was 0, the TP GS (3 cycles/year) breeding program, which had the  
447 shortest generation interval of 0.33 years, generated 2.01 times the genetic gain of the Conv  
448 breeding program, which had the longest generation interval of 3 years.

449 Fig. 4 also shows that the ranking of hybrid crop breeding programs for genetic gain  
450 was consistent across different genotype-by-year variances. This is shown by the average  
451 genetic values of hybrids in the final year (Year 20) of each graph. There was a perfect rank  
452 correlation between the generation interval and genetic gain of the breeding programs. Both  
453 graphs show the ranking from highest to lowest average genetic value was: TP GS (3  
454 cycles/year), GS-DH, TP GS (1 cycle/year), ConvGS, Conv.

455 However, the relative differences between hybrid crop breeding programs using  
456 genomic selection and those using phenotypic selection were smaller when genotype-by-year  
457 variance was 4. At this level of genotype-by-year variance, the best performing two-part hybrid  
458 crop breeding program, TP GS (3 cycles/year), generated 1.96 times the genetic gain of the  
459 conventional breeding program. When genotype-by-year variance was 0, this value was 2.01.  
460 The relative differences in genetic gain between hybrid crop breeding programs using genomic  
461 selection remained constant across different levels of genotype-by-year variance.

462 Fig. 4 also shows that adding genomic selection to the conventional program without  
463 reducing the generation interval did not show a significant increase in genetic gain. This is  
464 shown by comparing genetic gain in the Conv program with genetic gain in the ConvGS  
465 program. The ConvGS program produced 1.08 (95% CI [1.00, 1.16]) and 1.08 (95% CI [0.98,  
466 1.18]) times the genetic gain of the Conv program, when genotype-by-year variance was 0 and  
467 4, respectively.

468 All breeding programs using genomic selection displayed a similar genetic gain prior  
469 to Year 5 (Fig. 4). Year 5 was the first year that hybrids at the elite yield trial stage were derived  
470 from parents selected by genomic selection. Therefore, the differences in genetic gain between  
471 Year 1 and Year 5 reflect the difference between using genomic selection or phenotypic  
472 selection on existing germplasm from the burn-in.

473           The TP GS (1 cycle/year) breeding program did not generate genetic gain in Year 5 and  
474 Year 6. This is because no selection was undertaken in the first two generations of future  
475 breeding of two-part hybrid crop breeding programs. These first two generations were required  
476 to convert the doubled haploid inbred parents from burn-in breeding into outbred parents. The  
477 TP GS (3 cycles/year) breeding program did not show this lag as it was able to complete this  
478 process and one cycle of selection within the first year of future breeding.

479

#### 480 **Selection Accuracy**

481

482           Genomic selection increased the selection accuracy compared to phenotypic selection  
483 in the early stages of hybrid crop breeding programs. This is show in Fig. 5, which plots the  
484 correlations between the simulated, true general combining abilities (GCA) for DH lines at the  
485 DH stage and their GEBV. The first graph shows the mean selection accuracy for all breeding  
486 programs when genotype-by-year variance was 0. The second graph shows the same trends for  
487 genotype-by-year variance of 4. The selection accuracies in the hybrid crop breeding programs  
488 using genomic selection were higher than those using phenotypic selection. In Year 1 when  
489 genotype-by-year variance was 0, all hybrid crop breeding programs using genomic selection  
490 had a selection accuracy of 0.73 while the Conv breeding program had a selection accuracy of  
491 0.24.

492           Fig. 5 also shows that selection accuracies in all hybrid crop breeding programs  
493 decreased over the years of the simulation, and this decrease had a perfect rank correlation with  
494 the generation interval of hybrid crop breeding programs. This is shown by the average  
495 selection accuracy in the final year (Year 20) of each figure. Both figures show the ranking  
496 from highest to lowest average selection accuracy was: ConvGS, TP GS (1 cycle/year), GS-

497 DH, TP GS (3 cycles/year). The ranking of hybrid crop breeding programs for selection  
498 accuracy was consistent across different genotype-by-year variances.

499 Selection accuracy in the two-part hybrid crop breeding programs was also measured  
500 in the population improvement stage. This is shown in Fig. 6, which plots the correlation  
501 between the simulated, true GCA for parental candidates and their GEBV for each cycle of  
502 crossing. There were one and three cycles of crossing per year. Therefore, each cycle is plotted  
503 at one third of a year increments in Fig. 6. The first figure shows the selection accuracy when  
504 genotype-by-year variance was 0. The second figure shows the selection accuracy when  
505 genotype-by-year variance was 4. Fig. 6 shows the change in selection accuracy over time  
506 differed between the two-part breeding programs. The first figure shows that the TP GS (1  
507 cycle/year) breeding program displayed a gradual decrease in selection accuracy over time.  
508 The TP GS (3 cycles/year) breeding program displayed a faster decrease in selection accuracy  
509 and selection accuracy becomes 0 in Year 16. The second figure shows that selection accuracy  
510 remained constant over time when genotype-by-year was 4. Both graphs show yearly  
511 oscillations which correspond to the yearly updating of the training population.

512

### 513 **Genetic Variance**

514

515 All hybrid crop breeding programs displayed a reduction of genetic variance over  
516 simulation years. However, hybrid crop breeding programs using genomic selection caused a  
517 faster reduction of the genetic variance than the hybrid crop breeding program using  
518 phenotypic selection. This is shown in Fig. 7, which plots the change in genetic variance of  
519 hybrids at the elite yield trial stage over simulation years. The first graph shows the change in  
520 genetic variance for each future breeding program when genotype-by-year variance equals 0.  
521 The second graph shows the same breeding programs when genotype-by-year variance equals

522 4. The conventional breeding program displayed a gradual and consistent reduction of genetic  
523 variance across simulation years. All hybrid crop breeding programs using genomic selection  
524 displayed a large initial reduction of genetic variance. At Year 3 when genotype-by-year was  
525 0, the Conv breeding program had 1.25 times the genetic variance of the ConvGS breeding  
526 program. The reduction of genetic variance in subsequent years differed between the hybrid  
527 crop breeding programs using genomic selection.

528 Fig. 7 shows the change in genetic variance had a perfect rank correlation with the  
529 generation interval of hybrid crop breeding programs using genomic selection. This is shown  
530 by the genetic variance in the final year (Year 20) of each plot. Both graphs show the ranking  
531 from highest to lowest genetic variance was: ConvGS, TP GS (1 cycle/year), GS-DH, TP GS  
532 (3 cycles/year). When genotype-by-year variance was 0, the TP GS (3 cycles/year) breeding  
533 program had 0.44 times the genetic variance of the GS-DH breeding program and 0.07 times  
534 that of the Conv breeding program in Year 20. When genotype-by-year variance was 4, these  
535 values were 0.53 and 0.11, respectively. The ranking of hybrid crop breeding programs for  
536 genetic variance was consistent across different genotype-by-year variances.

537

### 538 **Crossing Schemes**

539

540 Genomic selection with the maximum avoidance of inbreeding crossing scheme  
541 produced similar genetic gain over the circular crossing scheme, but maintained higher levels  
542 of genetic variance. Therefore, the maximum avoidance of inbreeding crossing scheme had a  
543 higher conversion efficiency compared to the circular scheme. This is shown in Fig. 8, which  
544 plots the genetic gain against the reduction of genetic variance for each hybrid crop breeding  
545 program-crossing scheme combination. All hybrid crop breeding programs using genomic  
546 selection with the circular crossing scheme had lower efficiency than the conventional breeding



547 program using phenotypic selection. The first graph shows the trends for the mean values when  
548 genotype-by-year variance is 0. The second graph shows the same trends for genotype-by-year  
549 variance of 4. Fig. 8 also shows that hybrid crop breeding programs using genomic selection  
550 with the maximum avoidance crossing scheme had comparable conversion efficiency to the  
551 conventional breeding program using phenotypic selection. This ranking was consistent across  
552 different levels of genotype-by-year variance. Because the conversion efficiencies followed a  
553 very clear non-linear path (Fig. 8) it was not possible to formally test for statistically significant  
554 differences.  
555

## 556 **Discussion**

557 The results of this study highlight four points for discussion:

- 558 (i) the impact of reciprocal recurrent genomic selection on the drivers of genetic  
559 gain in hybrid crop breeding programs;
- 560 (ii) the impact of crossing schemes on genetic gain in hybrid crop breeding  
561 programs;
- 562 (iii) the limitations of the simulation undertaken; and
- 563 (iv) the practical implementation of the two-part strategy in real hybrid crop  
564 breeding programs.

565

### 566 **The impact of reciprocal recurrent genomic selection on the drivers of genetic gain in** 567 **hybrid crop breeding programs**

568

#### 569 *Generation Interval*

570 Reciprocal recurrent genomic selection increased the rate of genetic gain in hybrid crop  
571 breeding programs, mainly by a reduction in generation interval. In an animal breeding context  
572 reciprocal recurrent genomic selection is a method that uses crossbred data to predict parent  
573 specific breeding values (Kinghorn et al. 2010). In a hybrid crop breeding context, parent  
574 specific breeding values can be predicted using hybrid phenotypes and inbred parental  
575 genotypes, and previous studies have predicted that reciprocal recurrent genomic selection  
576 could improve rates of genetic gain (Longin et al. 2013; Rembe et al. 2019). The results in the  
577 present study support this, showing that using reciprocal recurrent genomic selection increased  
578 genetic gain within a conventional hybrid crop breeding program design. However, the  
579 development of inbred parents takes time, which increases the generation interval (Griffing

580 1975). The recently proposed two-part strategy (Gaynor et al., 2017) provides a framework to  
581 remove this time delay by using outbred parents. In the context of hybrid crop breeding  
582 programs, the two-part strategy enables reciprocal recurrent genomic selection and the  
583 completion of multiple generations per year. The two-part strategy for hybrid crop breeding  
584 programs outlined in this study used this principle to achieve a generation interval of 0.33  
585 years. Over the first ten years of breeding this drove a 1.33-fold increase in genetic gain  
586 compared to the best performing conventional plus genomic selection breeding program. While  
587 this is an important increase in rate of genetic gain, it is lower than the 3-fold expectation based  
588 on the breeder's equation (Lush 1943), which can be explained by decreases in the selection  
589 accuracy and genetic variance over time.

590

#### 591 *Selection Accuracy*

592 Rapid decreases in genomic selection accuracy were observed in two-part hybrid crop  
593 breeding programs and can be explained by:

- 594 (i) a larger number of generations separating individuals in the 'training  
595 population' and selection candidates; and  
596 (ii) the reduction of the genetic variance of the selection candidates due to genomic  
597 selection.

598 In the present study, the two-part breeding program, with the shortest generation  
599 interval of 0.33 years, displayed the fastest decrease in genomic selection accuracy over time.  
600 The decreasing trend in selection accuracy is consistent with previous simulations of two-part  
601 breeding strategy for inbred crops (Gaynor et al. 2017; Gorjanc et al. 2018), although, the trends  
602 in the present study were much larger. There are a number of possible reasons for this.

603 Fluctuations in the average effect (of an allele substitution) over time driven by different  
604 trait genetic architectures can partly explain the lower selection accuracy in the present study

605 compared to previous studies. The present study simulated a trait including both additive and  
606 dominance variation. When dominance contributes to trait variation, the average effects of  
607 alleles can change due to changes in allele frequencies (Falconer and Mackay 1996). The  
608 genomic estimated average effects of alleles are confounded with the ‘training population’  
609 allele frequency, so they may not provide good estimates for average effects of alleles in the  
610 selection candidate whose allele frequency can be different. The previous studies of Gaynor et  
611 al. (2017) and Gorjanc et al. (2018) simulated strictly additive traits, so the average effects of  
612 alleles remained constant.

613         The more rapid decrease in genomic selection accuracy in this study compared to  
614 previous implementations of two-part strategies may also be partially attributable to different  
615 strategies for updating the ‘training population’. Previous studies accumulated records in the  
616 ‘training population’ across all years of future breeding, while in this present study, the size of  
617 the ‘training population’ was kept constant over time by updating the training population using  
618 a 3-year sliding window approach. This resulted in a training population that trended to half  
619 the size of that used in Gaynor et al. (2017) and a quarter of the size used in Gorjanc et al.  
620 (2018). Thirdly, the higher number of generations per year used in population improvement  
621 caused a greater divergence in relatedness between the training population and selection  
622 candidates compared to Gaynor et al. (2017).

623

#### 624 *Genetic Variance*

625         The two-part strategy caused a rapid reduction of genetic variance in hybrid crop  
626 breeding programs. The reduction of genetic variance when using the two-part strategy may  
627 largely depend on how the additional genotyping costs in the population improvement are  
628 offset. Under a fixed budget, the additional genotyping costs could be offset in two simple  
629 ways. In the first strategy, the number of genotyped individuals per cross could be held constant

630 while the number of parents and crosses could be reduced for each additional cycle of  
631 population improvement per unit time. However, such a strategy would cause a reduction of  
632 the effective population size and this could expose the breeding program to accelerated  
633 reduction of genetic variance due to genetic drift (Charlesworth 2009). Therefore, to overcome  
634 this risk, this study implemented an alternative strategy that maintained the number of parents  
635 and crosses but reduced the number of genotyped individuals per cross. This alternative  
636 strategy aims to maintain the effective population size and mitigate the reduction of genetic  
637 variance due to genetic drift. The results from the present study show that this alternative  
638 strategy was not sufficient to mitigate the accelerated reduction of genetic variance in two-part  
639 hybrid crop breeding programs using the circular crossing scheme. The two-part breeding  
640 program using the circular crossing scheme, with a generation interval of 0.33 years, displayed  
641 the fastest decrease in genetic variance over time. The large decreases in genetic variance with  
642 such an aggressive approach limited long-term genetic gain. Therefore, the maximum  
643 avoidance of inbreeding crossing scheme was explored.

644

#### 645 **The impact of crossing schemes on the conversion efficiency in hybrid crop breeding** 646 **programs**

647 Reciprocal recurrent genomic selection with the maximum avoidance crossing scheme  
648 had the highest conversion efficiency, comparable to that of phenotypic selection. Genomic  
649 selection with the circular design crossing scheme had the lowest conversion efficiency. The  
650 higher conversion efficiency of the maximum avoidance crossing scheme was driven by a  
651 slower reduction of genetic variance over time compared to the circular scheme.

652 Crossing schemes are designed to manage genetic variance in breeding populations by  
653 avoiding the mating of closely related individuals. The circular scheme used in the present  
654 study does this by equalising the contributions of each cross. However, it can create higher

655 levels of inbreeding compared to other crossing schemes because multiple parents could be  
656 selected from the same family if sufficient differences in the estimates of family means exist.  
657 Over generations this could result in large decreases in genetic variance due to genetic drift.  
658 Maximum avoidance of inbreeding is a crossing scheme that maintains uniform contributions  
659 and inbreeding coefficients across all crosses (Wright 1921; Kimura and Crow 1963). The  
660 maximum avoidance of inbreeding crossing scheme mates the least related crosses in the first  
661 generation and uses within-family truncation selection to choose new parents. In the present  
662 study, maximum avoidance worked well. Two-part hybrid crop breeding programs using  
663 maximum avoidance showed much smaller reductions in genetic variance than those using  
664 circular scheme.

665         The higher conversion efficiency of the maximum avoidance crossing scheme was  
666 important for the long-term genetic gain of hybrid crop breeding programs. Long-term genetic  
667 gain is dependent on the ability to exploit the within-family component of a breeding value,  
668 which is called the Mendelian sampling term (Wray and Thompson 1990; Meuwissen 1997;  
669 Pong-Wong and Woolliams 1998; Woolliams et al. 2015). Reciprocal recurrent genomic  
670 selection enabled a high within-family selection accuracy (Fig. 8), which both the maximum  
671 avoidance and circular scheme crossing schemes exploit. However, the maximum avoidance  
672 scheme preserved more genetic variance which also maintained a higher within-family  
673 selection accuracy. Therefore, the two-part hybrid crop breeding programs using the maximum  
674 avoidance crossing scheme displayed the highest long-term genetic gain.

675

## 676 **The limitations of the study**

677

678           The simulations conducted in the present study did not model the full complexity of  
679 actual hybrid crop breeding programs. In this section the limitations and impact of key  
680 assumptions are discussed:

- 681           (i) assumptions about the genetic architecture;
- 682           (ii) assumptions that impact genomic selection accuracy;
- 683           (iii) assumptions about the reciprocal recurrent genomic selection model;
- 684           (iv) assumptions about the making of crosses;
- 685           (v) assumptions about the ratio between genotyping and phenotyping costs;
- 686           (vi) assumptions about the complexity of the breeding goal;
- 687           (vii) assumptions that impact the maintenance of genetic variance.

#### 688 *Assumptions about the genetic architecture*

689           The simulated trait was controlled by 3,000 QTL, a dominance degree of 0.9, a  
690 dominance variance of 0.3, and a heterotic pool split that occurred 100 generations ago. These  
691 values were chosen as they produced long-term trends for inbred and hybrid performance that  
692 reflected those observed in real data (Troyer and Wellin 2009). The main focus of the present  
693 study was on genetic gain, which relates to general combining ability (Sprague and Tatum  
694 1942). We hypothesise that tuning the parameters to match long term genetic gain results in  
695 greater uncertainty in variance due to specific combining ability rather than variance due to  
696 general combining ability. Therefore, the assumptions about the genetic architecture of the  
697 simulated trait are likely to have limited impact on the conclusions of this study.

698

#### 699 *Assumptions that impact genomic selection accuracy*

700           The genomic selection accuracies observed in these simulations are likely higher than  
701 those in real-world conditions. As previously described by Gaynor et al. (2017), this was  
702 because of conditions in the simulation that favoured high genomic selection accuracy such as

- 703 (i) molecular markers with no genotyping errors;  
704 (ii) genetic control of the trait that did not involve epistasis; and  
705 (iii) a closed breeding program.

706 The accuracy of genomic selection affects the genetic gain of the simulated breeding  
707 programs. These effects should affect all hybrid crop breeding programs using genomic  
708 selection similarly, which suggests that using the two-part strategy should still outperform the  
709 other genomic selection breeding strategies. However, the relative performance of breeding  
710 programs using phenotypic selection to the breeding programs using genomic selection could  
711 change. If this were to occur, the hybrid crop breeding programs using the two-part strategy  
712 should still outperform the conventional breeding program because of the magnitude of  
713 difference observed in the simulation.

714

#### 715 *Assumptions about the making of crosses*

716 An important assumption was how the present study performed crossing. As in Gaynor  
717 et al. (2017), the present study did not consider maturity differences between male and female  
718 parents. Maturity differences between prospective parents could result in particular crosses  
719 being missed, which could bring additional costs. Maturity differences could have specific  
720 impacts on the two crossing schemes used in the present study. Maturity differences could  
721 prevent each parent from being used twice, once as a male and once as a female, which was  
722 assumed in the circular design crossing scheme. Maturity differences could also result in  
723 missed crosses in the maximum avoidance crossing scheme. However, the flexibility of the  
724 maximum avoidance crossing scheme could account for maturity differences between  
725 prospective parents by replacing them by their next best-ranking siblings. Such maturity  
726 differences could have a more substantial impact on two-part breeding programs compared to  
727 the conventional plus genomic selection breeding programs, due to a higher number of crosses



728 per year and lower seed availability in the two-part. However, the implications of maturity  
729 differences are likely to be relatively small and therefore have a relatively small effect on the  
730 performance of hybrid crop breeding programs.

731

732 *Assumptions about the ratio between genotyping and phenotyping costs*

733 The present study considered the costs of genotyping and phenotyping to be equal, and  
734 may not reflect current or future cost ratios for different breeding operations. The ratio between  
735 genotyping and phenotyping costs is more than likely to reduce in the future. Improvements in  
736 technology and the benefits from economy of scale could reduce genotyping costs in the future.  
737 Phenotyping costs could also reduce in the future, but likely at a slower rate. Any reduction in  
738 the ratio between genotyping and phenotyping costs would reduce the reallocation of resources  
739 required for the deployment of genomic selection, which is likely to favour hybrid crop  
740 breeding programs with high genotyping requirements, such as those using the two-part  
741 strategy.

742

743 *Assumptions about the complexity of the breeding goal*

744 The commercial products of hybrid crop breeding programs are a small number of  
745 hybrid varieties that are each planted on thousands to millions of acres. Therefore, these  
746 commercial products need to meet a wide range of requirements across a wide range of  
747 potential target production environments. Hybrid crop breeding programs must consider  
748 multiple traits relating to agronomic performance, disease resistance, and end-use quality. The  
749 hybrid crop breeding programs examined in this simulation only considered a single  
750 quantitative trait with 3,000 QTL. We assumed that this trait represented grain yield. However,  
751 it could equally represent a selection index with a few additional assumptions: all traits are  
752 measured on all individuals, all traits are pleiotropic, and economic merit is linear.

753

754 *Assumptions that impact the maintenance of genetic variance*

755         The present study showed there might be a potential risk for the rapid reduction of  
756 genetic variance in two-part hybrid crop breeding programs. The present study may  
757 overemphasise the issue of reduction of genetic variance in hybrid crop breeding programs,  
758 due to a combination of simulating a closed system, non-epistatic trait architecture, high  
759 genomic selection accuracy and a simplified breeding goal. Two crossing schemes to mitigate  
760 the reduction of genetic variance, the circular design and maximum avoidance, were used in  
761 the present study. Still, the two-part hybrid crop breeding programs displayed rapid reductions  
762 of genetic variance using both crossing schemes. Optimal contribution selection (Meuwissen  
763 1997; Kinghorn et al. 1999; Woolliams et al. 2015; Gorjanc et al. 2018) and optimal cross  
764 selection (Allier et al. 2019) enable more complex crossing designs to avert the reduction of  
765 genetic variance in breeding programs. Such methods have the added benefit of balancing the  
766 choice between the maintenance of genetic variance, versus genetic gain and can, therefore, be  
767 tailored to prioritise short- and long-term genetic gain in two-part hybrid crop breeding  
768 programs. However, due to the large number of simulated scenarios optimal contribution  
769 methods were not used because they have high computational costs compared to the crossing  
770 schemes used in the present study.

771

772 **Further opportunities for the two-part strategy in real hybrid crop breeding programs**

773

774         The present study demonstrated that the deployment of the two-part strategy could  
775 significantly increase genetic gain compared to current hybrid crop breeding program designs.  
776 However, the implementation of the two-part strategy in hybrid crop breeding programs  
777 requires some additional developments.

778           Alternative strategies for managing genetic variation need to be explored. The  
779 maximum avoidance of inbreeding crossing scheme used in this simulation only works in a  
780 closed breeding pipeline, so it cannot accommodate germplasm exchange. The maximum  
781 avoidance of inbreeding crossing scheme also offers little freedom to alter the balance between  
782 genetic gain and maintenance of diversity. More advanced strategies based on optimal  
783 contribution selection offer the potential to address both these limitations and should be  
784 explored (Meuwissen 1997; Woolliams et al. 2015). Further, a pre-breeding process could be  
785 integrated into the population improvement component of each heterotic pool to introgress  
786 external germplasm from gene banks or other sources (Gorjanc et al. 2016; Yang et al. 2019).

787           The creation of an outbred training population could partially mitigate the rapid  
788 reduction of genomic selection accuracy in two-part hybrid crop breeding programs. The  
789 entries in this outbred training population would consist of progeny from testcrosses to  
790 genotyped plants from the population improvement component. The progeny would be  
791 evaluated in plots to test the merit of their parents. This strategy is similar to older strategies  
792 for early testing of inbred lines (Sprague 1946). This data could be used to increase selection  
793 accuracy because it would reduce the genetic distance between the training and prediction  
794 individuals, which is known to be a significant determinant of accuracy (Habier et al. 2007;  
795 Clark et al. 2012). For example, in the current simulation the maximum number of generations  
796 between the selection candidates and the most recent training population lines could be cut in  
797 half by bypassing the creation of DH lines. Finally, a more speculative additional use of such  
798 an outbred training population would be to directly derive inbred lines from this population via  
799 apomixis.

800           The further opportunities for the two-part strategy in hybrid crop breeding programs,  
801 outlined here, incur further costs such as additional genotyping. Therefore, the implementation  
802 of the two-part strategy requires resource reallocation to account for these additional costs. The

803 present study reallocated resources by reducing the number of selection candidates evaluated  
804 in the product development pipeline and maximised the number of crosses per generation in  
805 the population improvement component. However, the optimal resource reallocation strategy  
806 may differ between breeding programs. For example, breeding programs serving a smaller  
807 geographical region could reduce the number of trial locations in the product development  
808 pipeline. Therefore, optimal resource reallocation strategies require further research.

809 The deployment of the two-part strategy is a fundamental change to current practices  
810 in breeding programs and is currently untested empirically. Therefore, the development of  
811 bespoke transition strategies is required which would build the data sets the two-part strategy  
812 requires and build empirical confidence in its performance.

813

## 814 **Conclusions**

815 Hybrid crop breeding programs using a two-part strategy produced the most genetic gain,  
816 but a maximum avoidance of inbreeding crossing scheme was required for it to increase long-  
817 term genetic gain. The two-part strategy uses outbred parents to complete multiple generations  
818 per year in hybrid crop breeding programs. In contrast conventional plus genomic selection  
819 strategies are limited in this regard by the time they take to develop inbred lines. The maximum  
820 avoidance of inbreeding crossing scheme manages genetic variance by maintaining uniform  
821 contributions and inbreeding coefficients across all crosses. This study performed stochastic  
822 simulations to quantify the potential of a two-part strategy in combination with two crossing  
823 schemes to increase the rate of genetic gain in hybrid crop breeding programs. Three main  
824 conclusions can be drawn from the results:

825 (i) the implementation of genomic selection in hybrid crop breeding programs  
826 increases the rate of genetic gain;

827 (ii) the two-part strategy was the most cost-effective strategy for implementing  
828 genomic selection in hybrid crop breeding programs.

829 (iii) two-part hybrid crop breeding programs completing multiple selection cycles  
830 per year should use crossing schemes to manage genetic variance.

831 As well as the benefits outlined in this study, the flexibility of the two-part strategy offers  
832 further opportunities to integrate new technologies to further increase genetic gain in hybrid  
833 crop breeding programs, such as the use of outbred training populations. However, the  
834 practical implementation of the two-part strategy will require the development of bespoke  
835 transition strategies to fundamentally change the data, logistics, and infrastructure that  
836 underpin hybrid crop breeding programs.

837

838

839

840

841

842

843

844

845

846

847

848

849

850

851

852 **Author contributions statement**

853 OP and JMH conceived the study. OP, JMH and RCG designed the study. OP developed the  
854 plant breeding program simulation. OP wrote the manuscript with input from all authors. All  
855 authors read and approved the final manuscript.

856

857 **Acknowledgments**

858 The authors acknowledge the financial support from the BBSRC ISPG to The Roslin Institute  
859 (BBS/E/D/30002275). This work has made use of the resources provided by the Edinburgh  
860 Compute and Data Facility (ECDF) (<http://www.ecdf.ed.ac.uk>).

861

862 **Conflict of interest**

863 The authors declare that they have no conflict of interest.

## 864 Figures

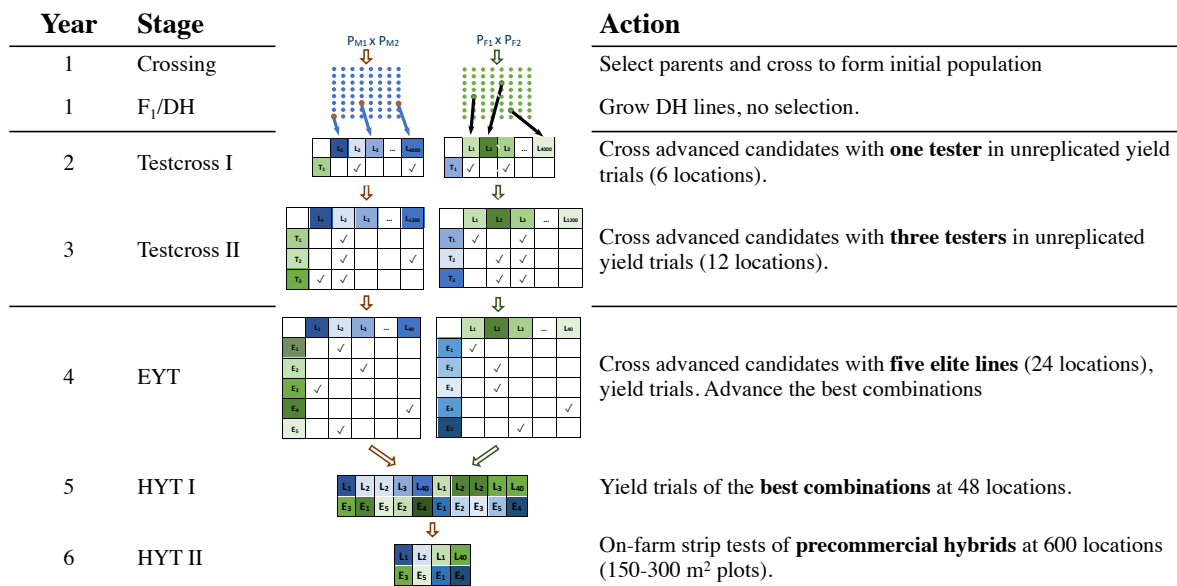

865  
866  
867  
868  
869

**Fig. 1 Overview of breeding schemes for the conventional hybrid crop breeding program (used in burn-in breeding) and the breeding programs using standard genomic selection strategies.** DH, doubled haploid; EYT, elite yield trial; HYT I, hybrid yield trial 1; HYT II, hybrid yield trial 2

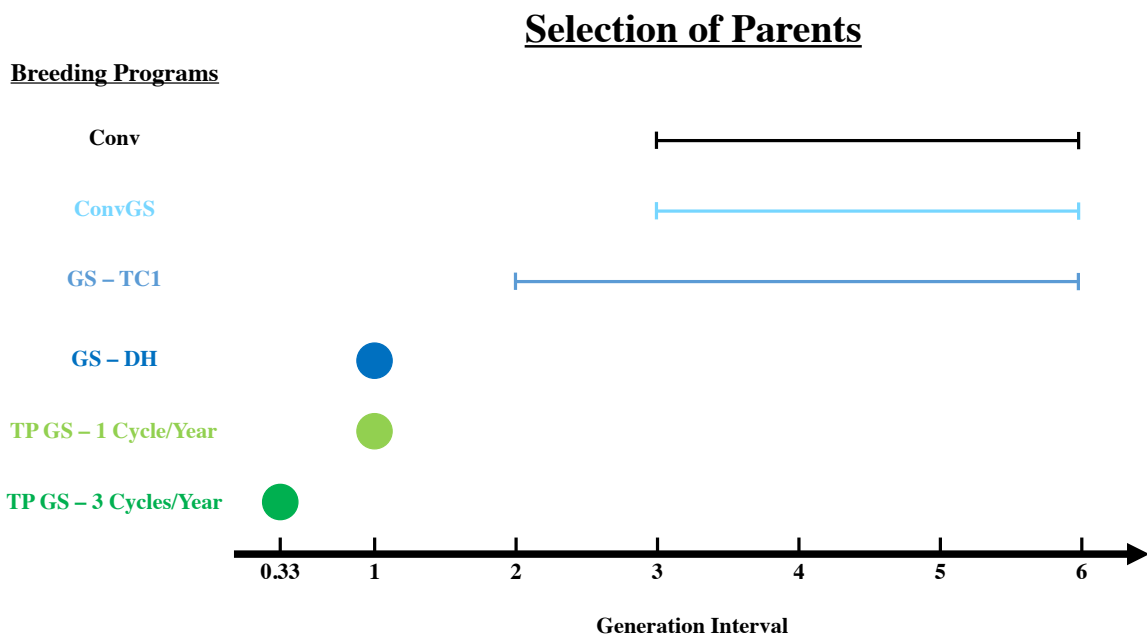

870  
871  
872  
873  
874  
875  
876

**Fig. 2 The generation intervals of hybrid crop breeding programs.** Conv, conventional breeding program; ConvGS, conventional program with genomic selection; GS-TC1, genomic selection program with parents selected in the testcross 1 stage; GS-DH, genomic selection program with parents selected in the doubled haploid stage; TP GS, 1 Cycle/Year, two-part program with genomic selection; TP GS, 3 Cycles/Year, two-part program with genomic selection

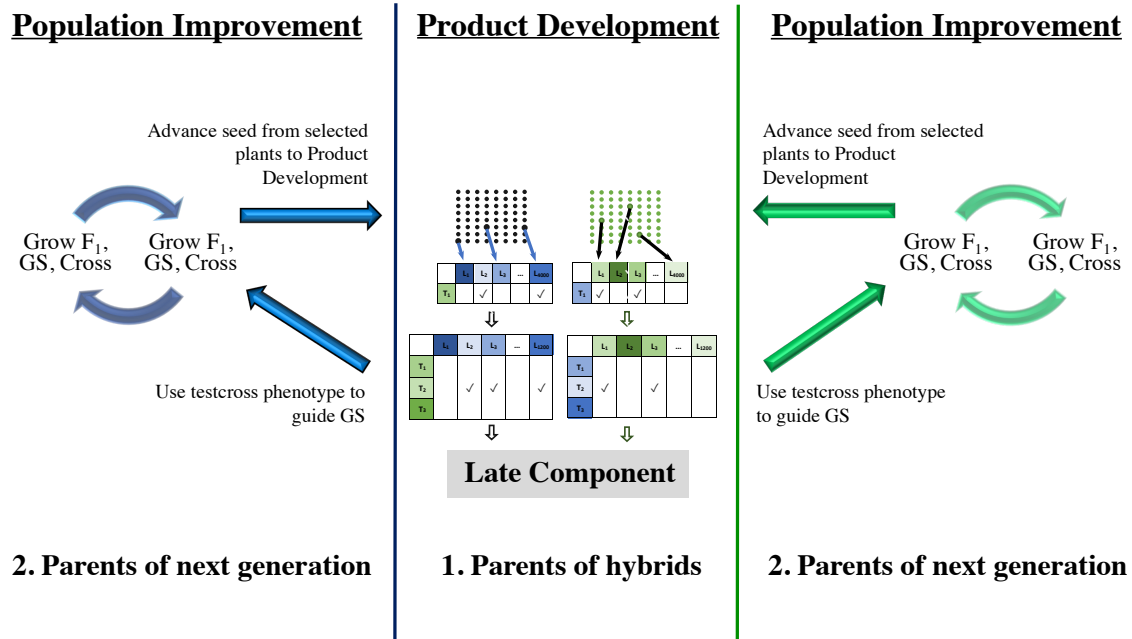

877  
878  
879  
880  
881

**Fig. 3 Overview of the two-part strategies with testcross genomic selection for hybrid crop breeding programs (TP GS, 1 Cycle/Year, TP GS, 3 Cycles/Year).** The number of crosses differed for each two-part breeding program to maintain equal operating costs. See Table 1

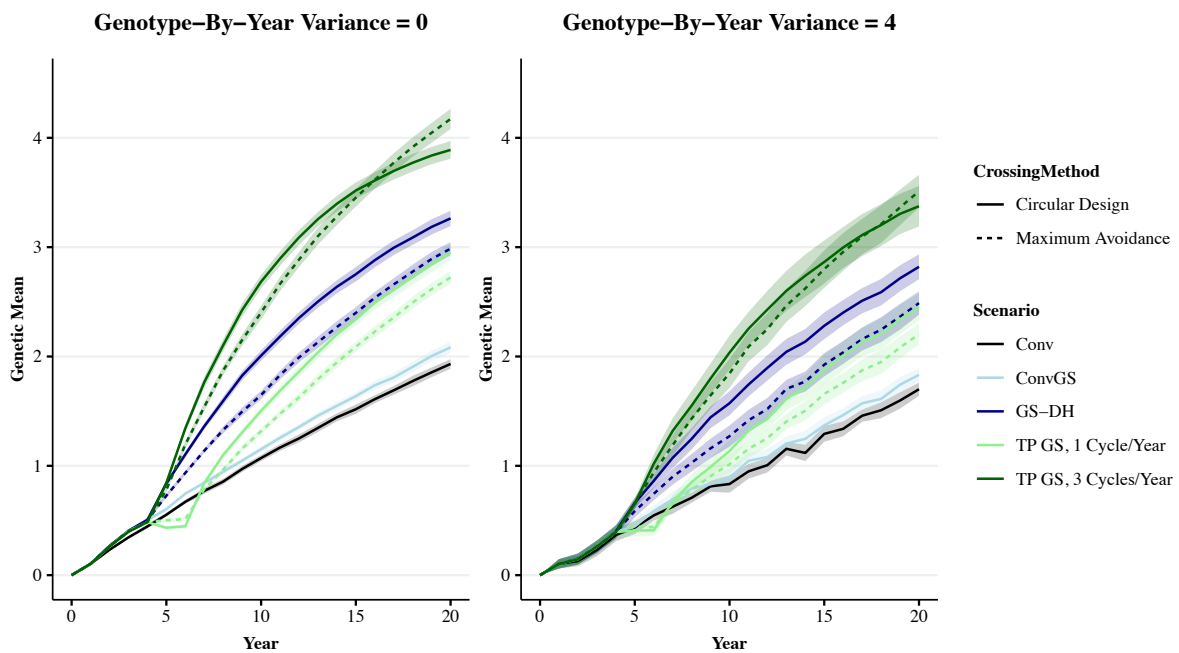

882  
883  
884  
885  
886  
887  
888  
889  
890

**Fig. 4 Genetic gain for all breeding programs over simulation years.** Genetic gain when genotype-by-year variance was 0 and 4. Genetic gain is expressed as mean genetic value of hybrids at the elite yield trial stage over time. The mean genetic value for all replicates were centered on 0 in Year 4. Means for all 10 replicates are shown with dark lines, with the shaded area representing the 95% confidence intervals of the mean. Conv, conventional breeding program; Conv GS, conventional program with genomic selection; GS-DH, genomic selection program with parents selected in the doubled haploid stage; TP GS, 1 Cycle/Year, two-part program with genomic selection; TP GS, 3 Cycles/Year, two-part program with genomic selection



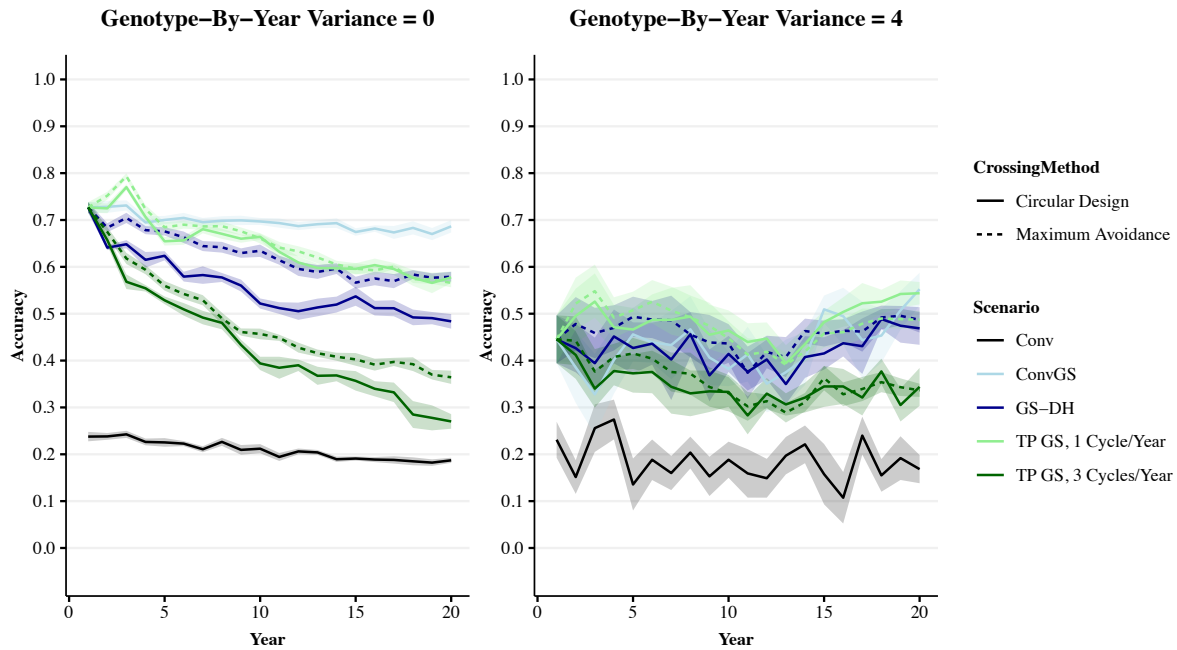

891  
 892 **Fig. 5 Selection accuracy for all breeding programs over selection cycles.** Selection accuracy when genotype-by-year variance was 0 and 4. Selection accuracy is expressed as the correlation between true and predicted general combining abilities of doubled haploid (DH) lines at the DH stage over selection cycles. Means for all 10 replicates are shown with dark lines, with the shaded area representing the 95% confidence intervals of the mean. Conv, conventional breeding program; Conv GS, conventional program with genomic selection; GS-DH, genomic selection program with parents selected in the doubled haploid stage; TP GS, 1 Cycle/Year, two-part program with genomic selection; TP GS, 3 Cycles/Year, two-part program with genomic selection  
 893  
 894  
 895  
 896  
 897  
 898  
 899

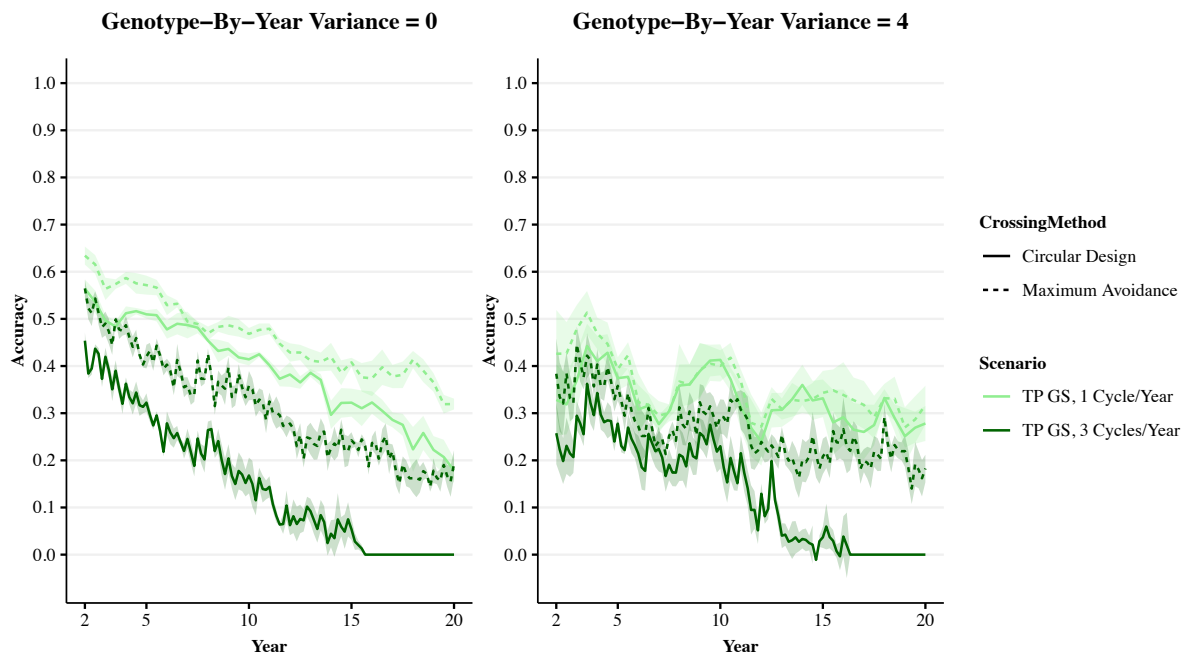

900  
 901 **Fig. 6 Within-family selection accuracy in the population improvement components of the two-part**  
 902 **breeding programs.** Within-family selection accuracy when genotype-by-year variance was 0 and 4. Within-  
 903 family selection accuracy is expressed as the correlation between the simulated, true general combining abilities  
 904 (GCA) for parental candidates and their predicted GCA. Means for all 10 replicates are shown with dark lines,  
 905 with the shaded area representing the 95% confidence intervals of the mean. TP GS, 1 Cycle/Year, two-part  
 906 program with genomic selection; TP GS, 3 Cycles/Year, two-part program with genomic selection  
 907

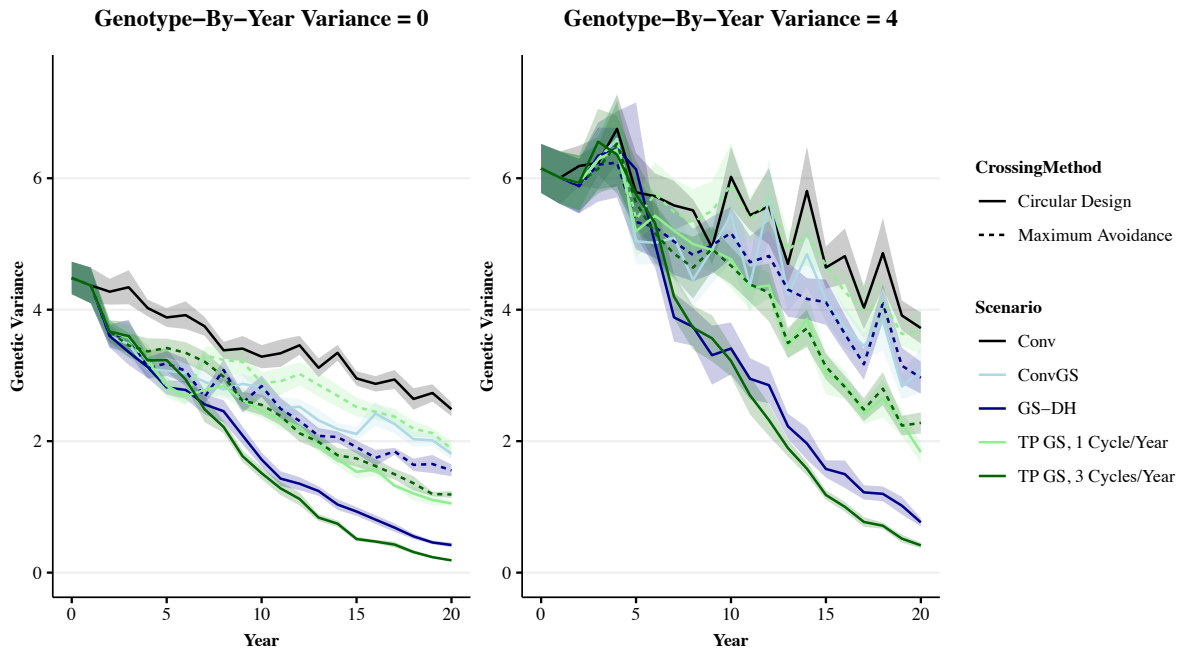

908  
 909 **Fig. 7 Genetic variance for all breeding programs over simulation years.** Genetic variance when genotype-by-year variance was 0 and 4. Genetic variance is expressed as the genetic variance among hybrids at the elite yield trial (EYT) stage over simulation years. Means for all 10 replicates are shown with dark lines, with the shaded area representing the 95% confidence intervals of the mean. Conv, conventional breeding program; Conv GS, conventional program with genomic selection; GS-DH, genomic selection program with parents selected in the doubled haploid stage; TP GS, 1 Cycle/Year, two-part program with genomic selection; TP GS, 3 Cycles/Year, two-part program with genomic selection  
 911  
 912  
 913  
 914  
 915  
 916

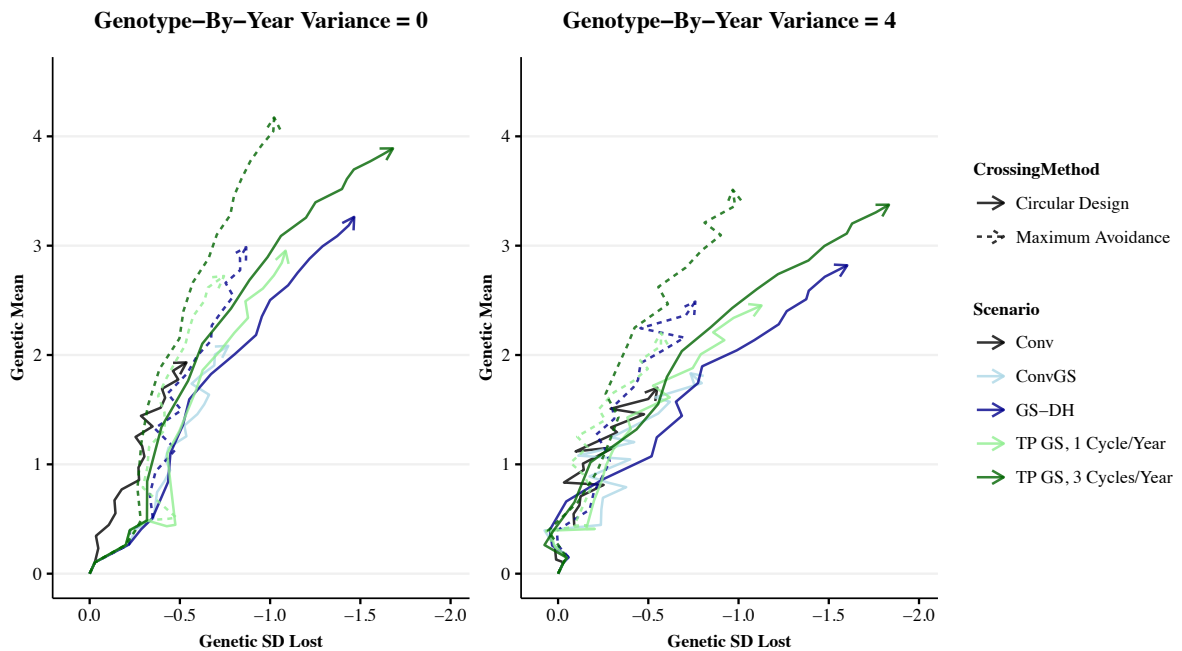

917  
 918 **Fig. 8 Conversion efficiency for all breeding programs over simulation years.** Conversion efficiency when genotype-by-year variance was 0 and 4. Conversion efficiency is presented as the genetic gain against the genetic variance among hybrids at the elite yield trial between Year 0 and Year 20 of the simulation. Means for all 10 replicates are shown. Conv, conventional breeding program; Conv GS, conventional program with genomic selection; GS-DH, genomic selection program with parents selected in the doubled haploid stage; TP GS, 1 Cycle/Year, two-part program with genomic selection; TP GS, 3 Cycles/Year, two-part program with genomic selection  
 921  
 922  
 923  
 924

## 925 **References**

926

927 Alexandratos N, Bruinsma J (2012) World agriculture towards 2030/2050. *Land Use Policy*  
928 20:375. [https://doi.org/10.1016/S0264-8377\(03\)00047-4](https://doi.org/10.1016/S0264-8377(03)00047-4)

929 Allier A, Lehermeier C, Charcosset A, et al (2019) Improving Short- and Long-Term Genetic  
930 Gain by Accounting for Within-Family Variance in Optimal Cross-Selection. *Front*  
931 *Genet* 10:1006. <https://doi.org/10.3389/fgene.2019.01006>

932 Bernardo R (2014) *Essentials of Plant Breeding*. Stemma Press

933 Bernardo R, Yu J (2007) Prospects for Genomewide Selection for Quantitative Traits in  
934 Maize. *Crop Science* 47:1082. <https://doi.org/10.2135/cropsci2006.11.0690>

935 Charlesworth B (2009) Fundamental concepts in genetics: Effective population size and  
936 patterns of molecular evolution and variation. *Nature Reviews Genetics* 10:195–205.  
937 <https://doi.org/10.1038/nrg2526>

938 Chen GK, Marjoram P, Wall JD (2009) Fast and flexible simulation of DNA sequence data.  
939 *Genome Res* 19:136–142. <https://doi.org/10.1101/gr.083634.108>

940 Clark S a, Hickey JM, Daetwyler HD, van der Werf JH (2012) The importance of  
941 information on relatives for the prediction of genomic breeding values and the  
942 implications for the makeup of reference data sets in livestock breeding schemes.  
943 *Genetics Selection Evolution* 44:4. <https://doi.org/10.1186/1297-9686-44-4>

944 Duvick DN, Smith JSC, Cooper M (2010) Long-Term Selection in a Commercial Hybrid  
945 Maize Breeding Program. In: Janick J (ed) *Plant Breeding Reviews*. John Wiley &  
946 Sons, Inc., Oxford, UK, pp 109–151

- 947 Falconer DS, Mackay TFC (1996) Introduction to Quantitative Genetics. Longman, Harlow,  
948 UK
- 949 Gaynor RC, Gorjanc G, Bentley AR, et al (2017) A two-part strategy for using genomic  
950 selection to develop inbred lines. *Crop Science* 57:2372–2386.  
951 <https://doi.org/10.2135/cropsci2016.09.0742>
- 952 Gaynor RC, Gorjanc G, Wilson D, Hickey JM (2019) AlphaSimR. Version 0.11.0URL  
953 <http://CRAN.R-project.org/package=AlphaSimR>
- 954 Geiger HH, Gordillo GA (2009) DOUBLED HAPLOIDS IN HYBRID MAIZE BREEDING.  
955 *Maydica* 485–499
- 956 Gorjanc G, Gaynor RC, Hickey JM (2018) Optimal cross selection for long-term genetic gain  
957 in two-part programs with rapid recurrent genomic selection. *Theor Appl Genet*  
958 131:1953–1966. <https://doi.org/10.1007/s00122-018-3125-3>
- 959 Gorjanc G, Jenko J, Hearne SJ, Hickey JM (2016) Initiating maize pre-breeding programs  
960 using genomic selection to harness polygenic variation from landrace populations.  
961 *BMC Genomics* 17:30. <https://doi.org/10.1186/s12864-015-2345-z>
- 962 Griffing B (1975) Efficiency changes due to use of doubled-haploids in recurrent selection  
963 methods. *Theoret Appl Genetics* 46:367–385. <https://doi.org/10.1007/BF00281141>
- 964 Habier D, Fernando RL, Dekkers JCM (2007) The impact of genetic relationship information  
965 on genome-assisted breeding values. *Genetics* 177:2389–2397.  
966 <https://doi.org/10.1534/genetics.107.081190>
- 967 Hull FH (1945) Recurrent selection and specific combining ability in corn. *J Amer Soc*  
968 *Agron*

- 969 Kimura M, Crow JF (1963) On the maximum avoidance of inbreeding. *Genet Res* 4:399–  
970 415. <https://doi.org/10.1017/S0016672300003797>
- 971 Kinghorn BP, Hickey JM, Werf JHJVD (2010) Reciprocal Recurrent Genomic Selection for  
972 Total Genetic Merit in Crossbred Individuals. *Proc 9th WCGALP* 0036
- 973 Kinghorn BP, Shepherd RK, Woolliams JL (1999). In: *Proceedings of the Association for the*  
974 *Advancement of Animal Breeding and Genetics*. p 412
- 975 Longin CFH, Gowda M, Mühleisen J, et al (2013) Hybrid wheat: quantitative genetic  
976 parameters and consequences for the design of breeding programs. *Theor Appl Genet*  
977 126:2791–2801. <https://doi.org/10.1007/s00122-013-2172-z>
- 978 Lush JL (1943) *Animal Breeding Plans*. Iowa State Press
- 979 Meuwissen THE (1997) Maximizing the response of selection with a predefined rate of  
980 inbreeding. *Journal of Animal Science* 75:934–940. <https://doi.org/doi:/1997.754934x>
- 981 Pong-Wong R, A. Woolliams J (1998) Response to mass selection when an identified major  
982 gene is segregating. *Genetics Selection Evolution* 30:313–337
- 983 R Development Core Team (2014) *R: A language and environment for statistical computing*.  
984 R Foundation for Statistical Computing, Vienna, Austria
- 985 Ramsey FL, Schafer DW (2002) *The Statistical Sleuth: A Course in Methods of Data*  
986 *Analysis*, 2nd edn. Duxbury/Thomson Learning, Australia
- 987 Rembe M, Zhao Y, Jiang Y, Reif JC (2019) Reciprocal recurrent genomic selection: an  
988 attractive tool to leverage hybrid wheat breeding. *Theor Appl Genet* 132:687–698.  
989 <https://doi.org/10.1007/s00122-018-3244-x>

- 990 Sprague GF (1946) THE EXPERIMENTAL BASIS FOR HYBRID MAIZE. Biological  
991       Reviews 21:101–120. <https://doi.org/10.1111/j.1469-185X.1946.tb00317.x>
- 992 Sprague GF, Tatum LA (1942) General vs. Specific Combining Ability in Single Crosses of  
993       Corn <sup>1</sup>. Agron J 34:923–932.  
994       <https://doi.org/10.2134/agronj1942.00021962003400100008x>
- 995 Troyer AF, Wellin EJ (2009) Heterosis decreasing in hybrids: Yield test inbreds. Crop  
996       Science 49:1969–1976. <https://doi.org/10.2135/cropsci2009.04.0170>
- 997 Whittaker JC, Thompson R, Denham MC (2000) Marker-assisted selection using ridge  
998       regression. Genet Res 75:249–252
- 999 Woolliams JA, Berg P, Dagnachew BS, Meuwissen THE (2015) Genetic contributions and  
1000       their optimization. Journal of Animal Breeding and Genetics 132:89–99.  
1001       <https://doi.org/10.1111/jbg.12148>
- 1002 Wray NR, Thompson R (1990) Prediction of rates of inbreeding in selected populations.  
1003       Genet Res 55:41–54. <https://doi.org/10.1017/S0016672300025180>
- 1004 Wright S (1921) Systems of Mating. II. the Effects of Inbreeding on the Genetic Composition  
1005       of a Population. Genetics 6:124–143
- 1006 Yang CJ, Sharma R, Gorjanc G, et al (2019) Origin Specific Genomic Selection: a simple  
1007       process to optimize the favourable contribution of parents to progeny. Genetics  
1008  
1009
